# Supplementary material
Source: Research Square preprint supplement (doi:10.21203/rs.3.rs-9192196/v1)
Supplement: Supplementary file 1 [file 583cea52aac419ffac220ec9.docx]

Support Information

**High-performance p-type two-dimensional transistors enabled by weak disorder engineering**

Yinghao Wei1, Yuchen Zhang1, Jinxuan Liang1, Xiaojun Zhou1, Yida Dong2, Peng Zhang3, Peng Chen*1

*1State Key Laboratory of Quantum Functional Materials, School of Microelectronics, Southern University of Science and Technology, Shenzhen 518055, China*

*2Department of Electronic and Electrical Engineering, Southern University of Science and Technology, Shenzhen 518055, China*

*3Institute of Major Scientific Facilities for New Materials, Southern University of Science and Technology, Shenzhen 518055, China*

**Correspondence:* [*chenp6@sustech.edu.cn*](mailto:chenp6@sustech.edu.cn)

**
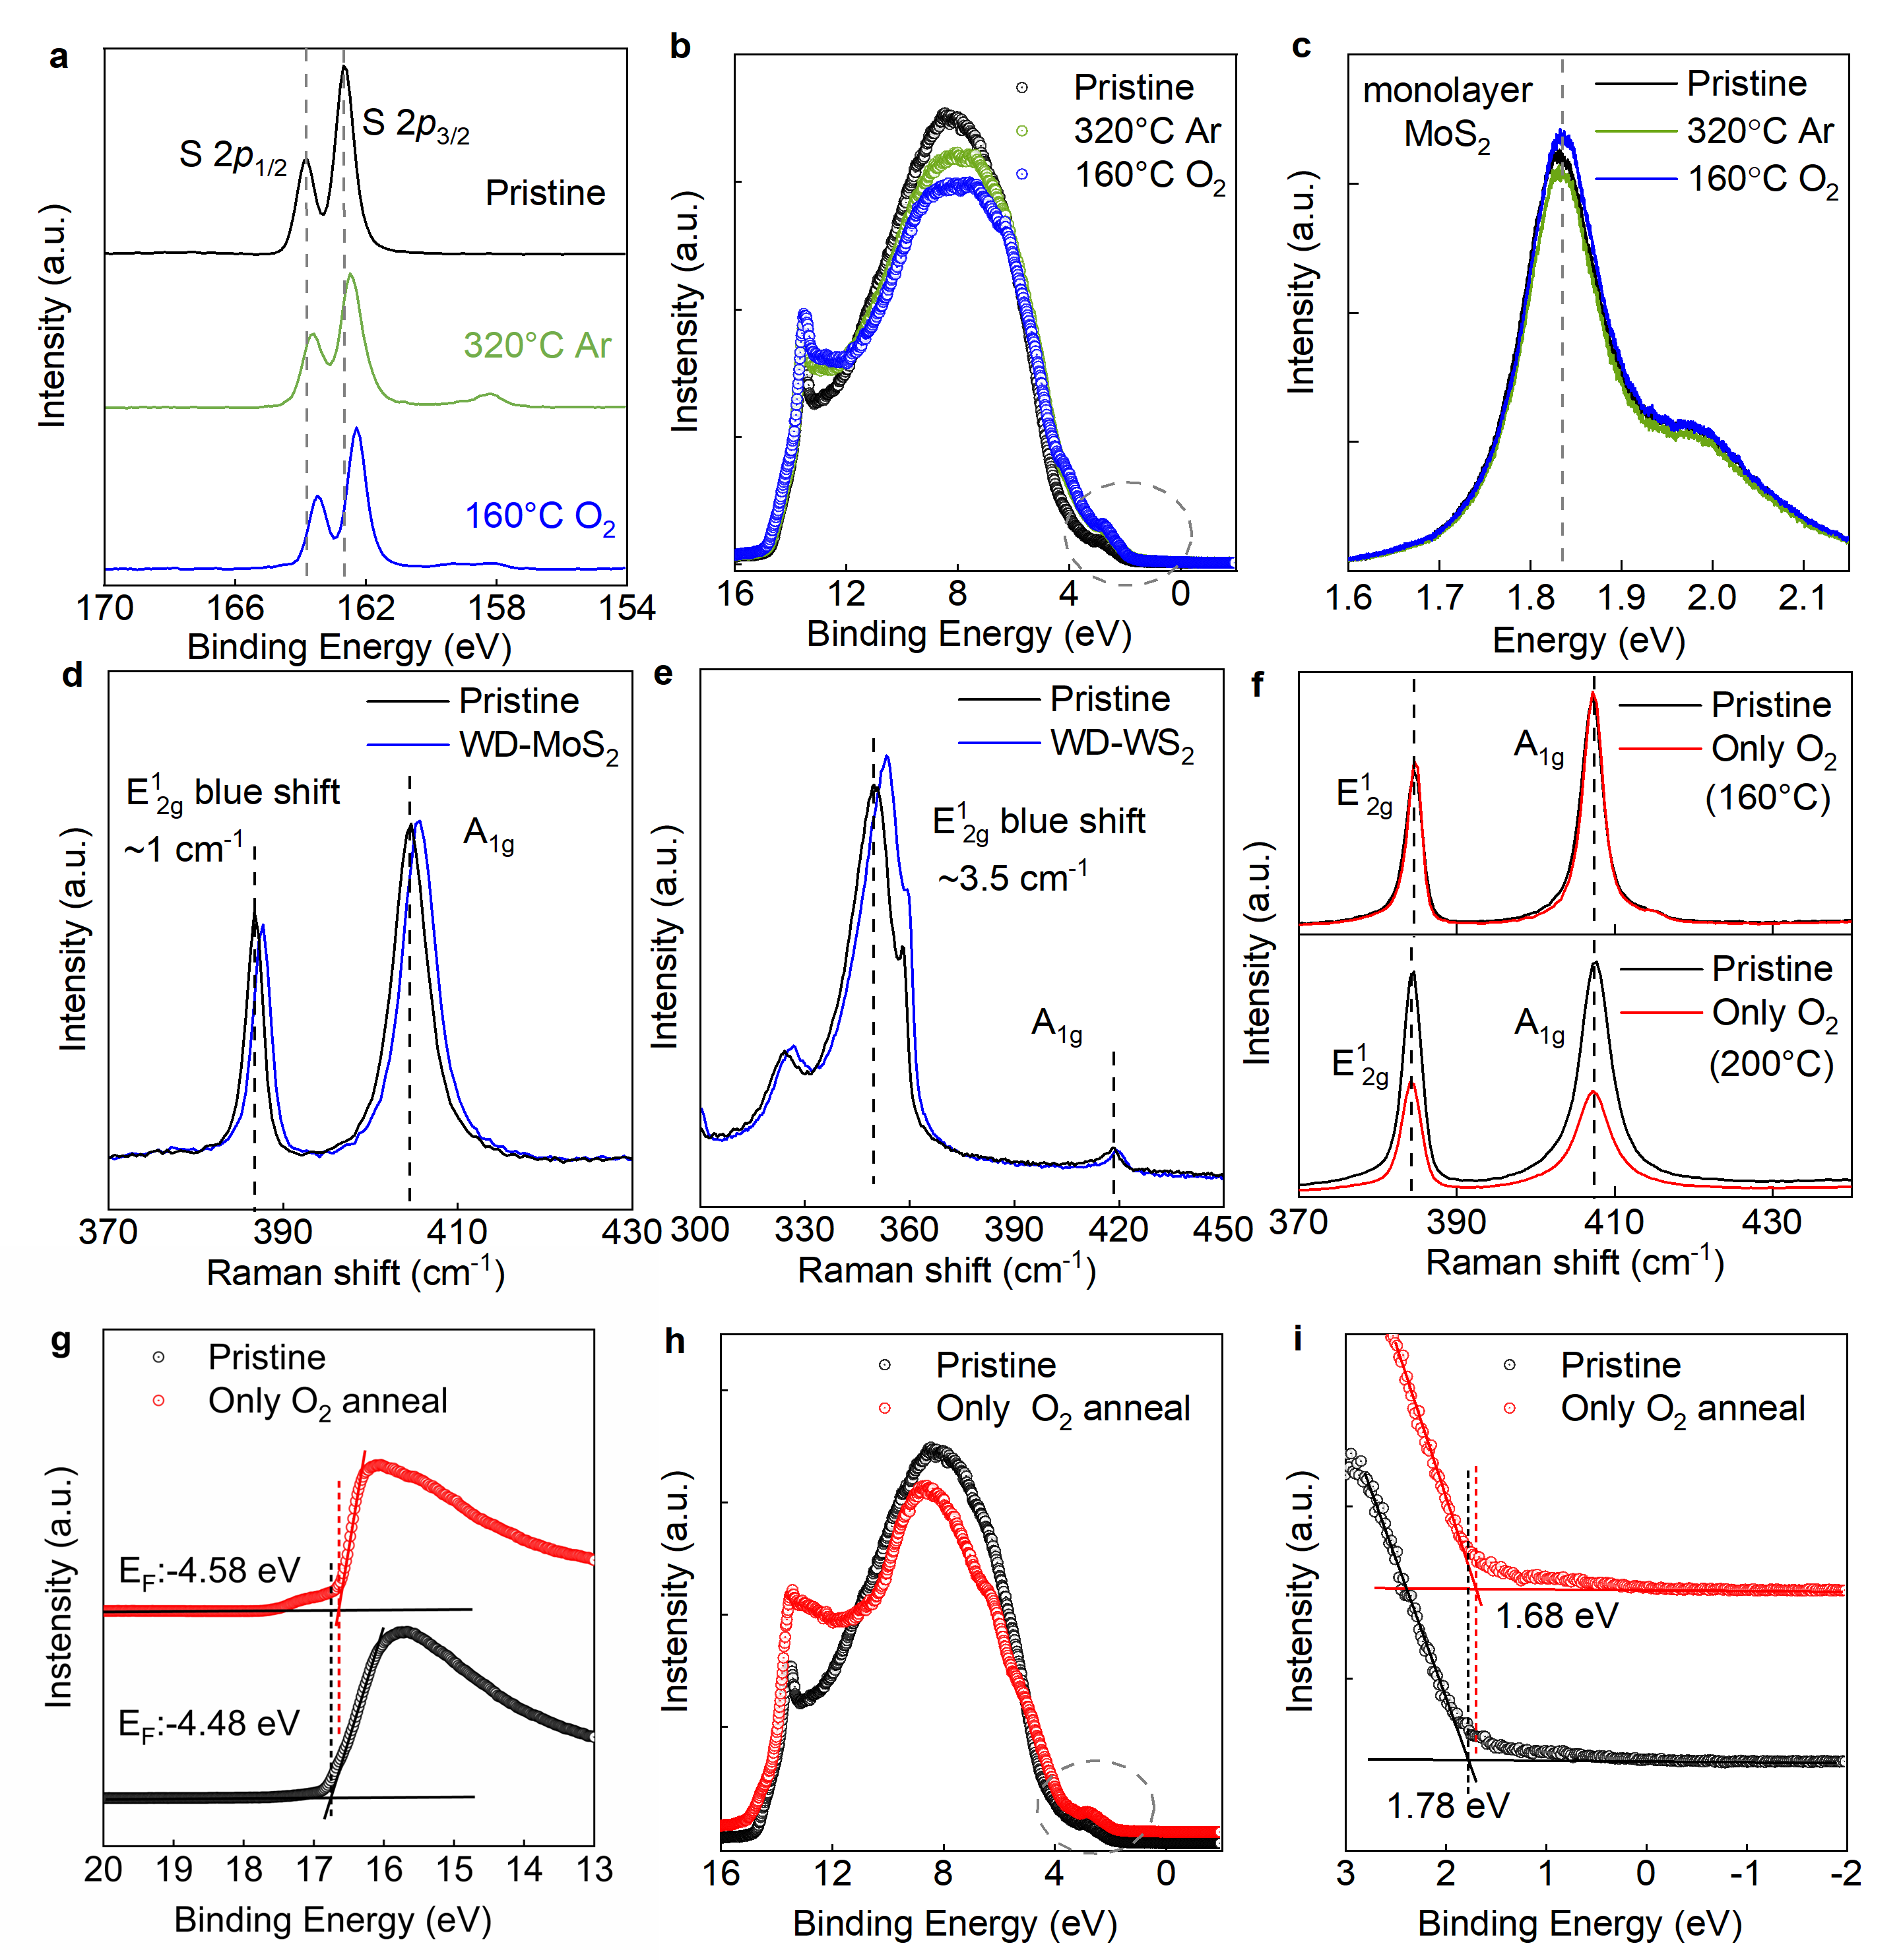
**

**Supplementary Fig. 1| Spectroscopic Characterization of p-doped MoS2. a,** XPS characterization of pristine MoS2, 320 °C annealed MoS2, and WD-MoS2 with further 160 °C O2 annealing. The FWHM of S 2*p*3/2 is 0.68, 0.8, and 0.68 eV forpristine MoS2, 320 °C annealed MoS2, and WD-MoS2, respectively. **b,** Valence band spectra of pristine MoS2, 320 °C annealed MoS2, and WD-MoS2 with further 160 °C O2 annealing. The dashed circle marks the near valence band edge region. **c,** Photoluminescence (PL) spectra of monolayer pristine MoS2, 320 °C annealed MoS2, and WD-MoS2 with further 160 °C O2 annealing. The peak positions in the PL spectra of MoS2 at different processing stages are largely consistent, indicating no significant change in the bandgap of MoS2 throughout the entire treatment process. **d,** The Raman spectra of monolayer pristine MoS2 and WD-MoS2. The peak displays a ~1 cm-1 blue shift, indicating compressive strain in WD-MoS2. **e,** The Raman spectra of monolayer pristine WS2 and WD-WS2. The peak displays a ~3.5 cm-1 blue shift, indicating compressive strain in WD-WS2. **f,** The Raman spectra of 3-layer MoS2 in the pristine state and following single-step oxygen annealing at different temperatures. **g,** UPS characterization of pristine MoS2, and MoS2 subjected to 160 °C O2 annealing only. The black and red dashed lines mark the binding energy of the electron cutoff (*E*cutoff) of the pristine MoS2, and MoS2 subjected to 160 °C O2 annealing only. **h, i,** Valence band spectra of pristine MoS2, and MoS2 subjected to 160 °C O2 annealing only. The dashed circle marks the near valence band edge region. The black and red dashed lines indicate the position of VBM below the *E*F (*E*F = 0 eV) for the pristine MoS2, and MoS2 subjected to 160 °C O2 annealing only.

**
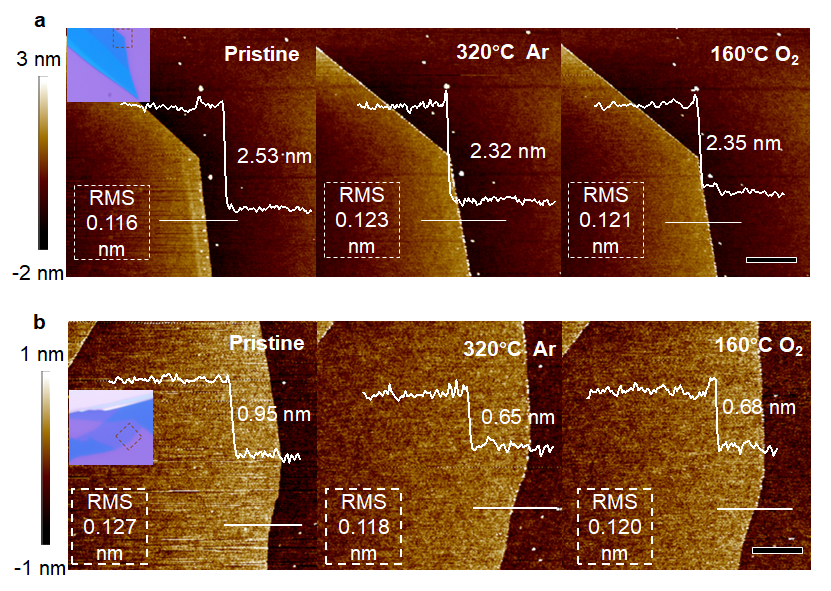
**

**Supplementary Fig. 2|** **AFM images of 2D MoS2 at different treatment stages. a,** AFM images of a 4-layer MoS2 on SiO2 before and after the two-step treatment process. **b,** AFM images of monolayer MoS2 on SiO2 before and after the two-step treatment process.Scale bar, 1 μm.After annealing at 320 °C in Ar, the thickness of the 4-layer MoS2 decreased from 2.53 nm to 2.32 nm, which can be attributed to the creation of sulfur vacancies and the decreased van der Waals gap between the MoS2 and the substrate. Subsequent annealing at 160 °C in an O2 atmosphere led to a slight increase in thickness from 2.32 nm to 2.35 nm, as oxygen atoms passivate the sulfur vacancies. The root-mean-square (RMS) surface roughness of MoS2 changed marginally from 0.116 nm to 0.121 nm after the two-step process, indicating that the weak-disorder doping strategy does not severely degrade the lattice structure of 2D MoS2. Similar trends were observed for monolayer MoS2.


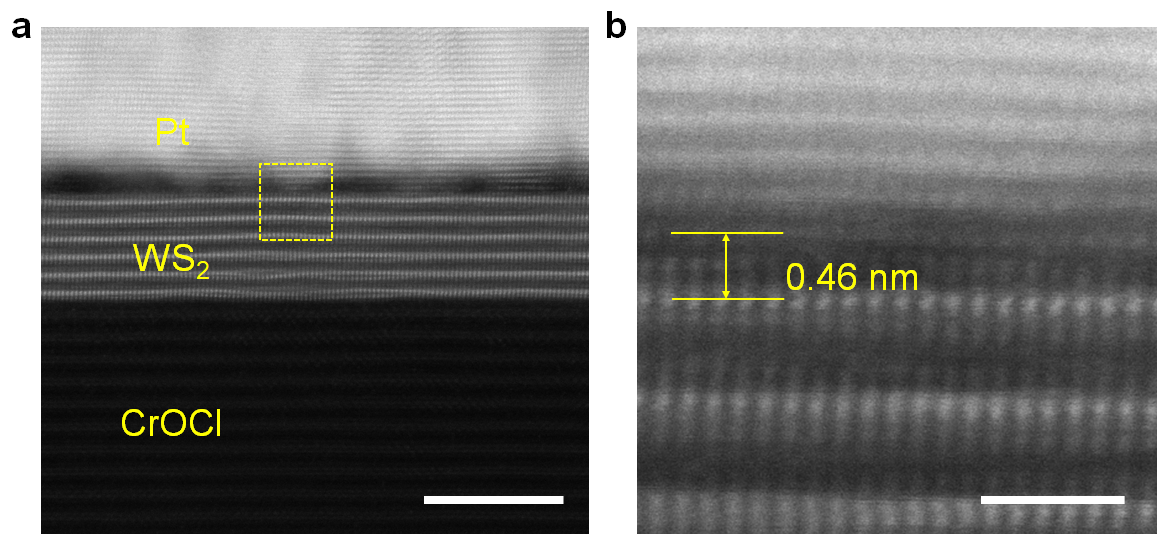


**Supplementary Fig. 3|** **HAADF-STEM images of Pt-WS2 interface. a,** HAADF-STEM image showing a clean interface between Pt and WS2. Scale bar, 5 nm. **b,** Magnified view of the dashed rectangular region in **a**. The distance between Pt and W is 0.46 ± 0.01 nm. Scale bar, 1nm.


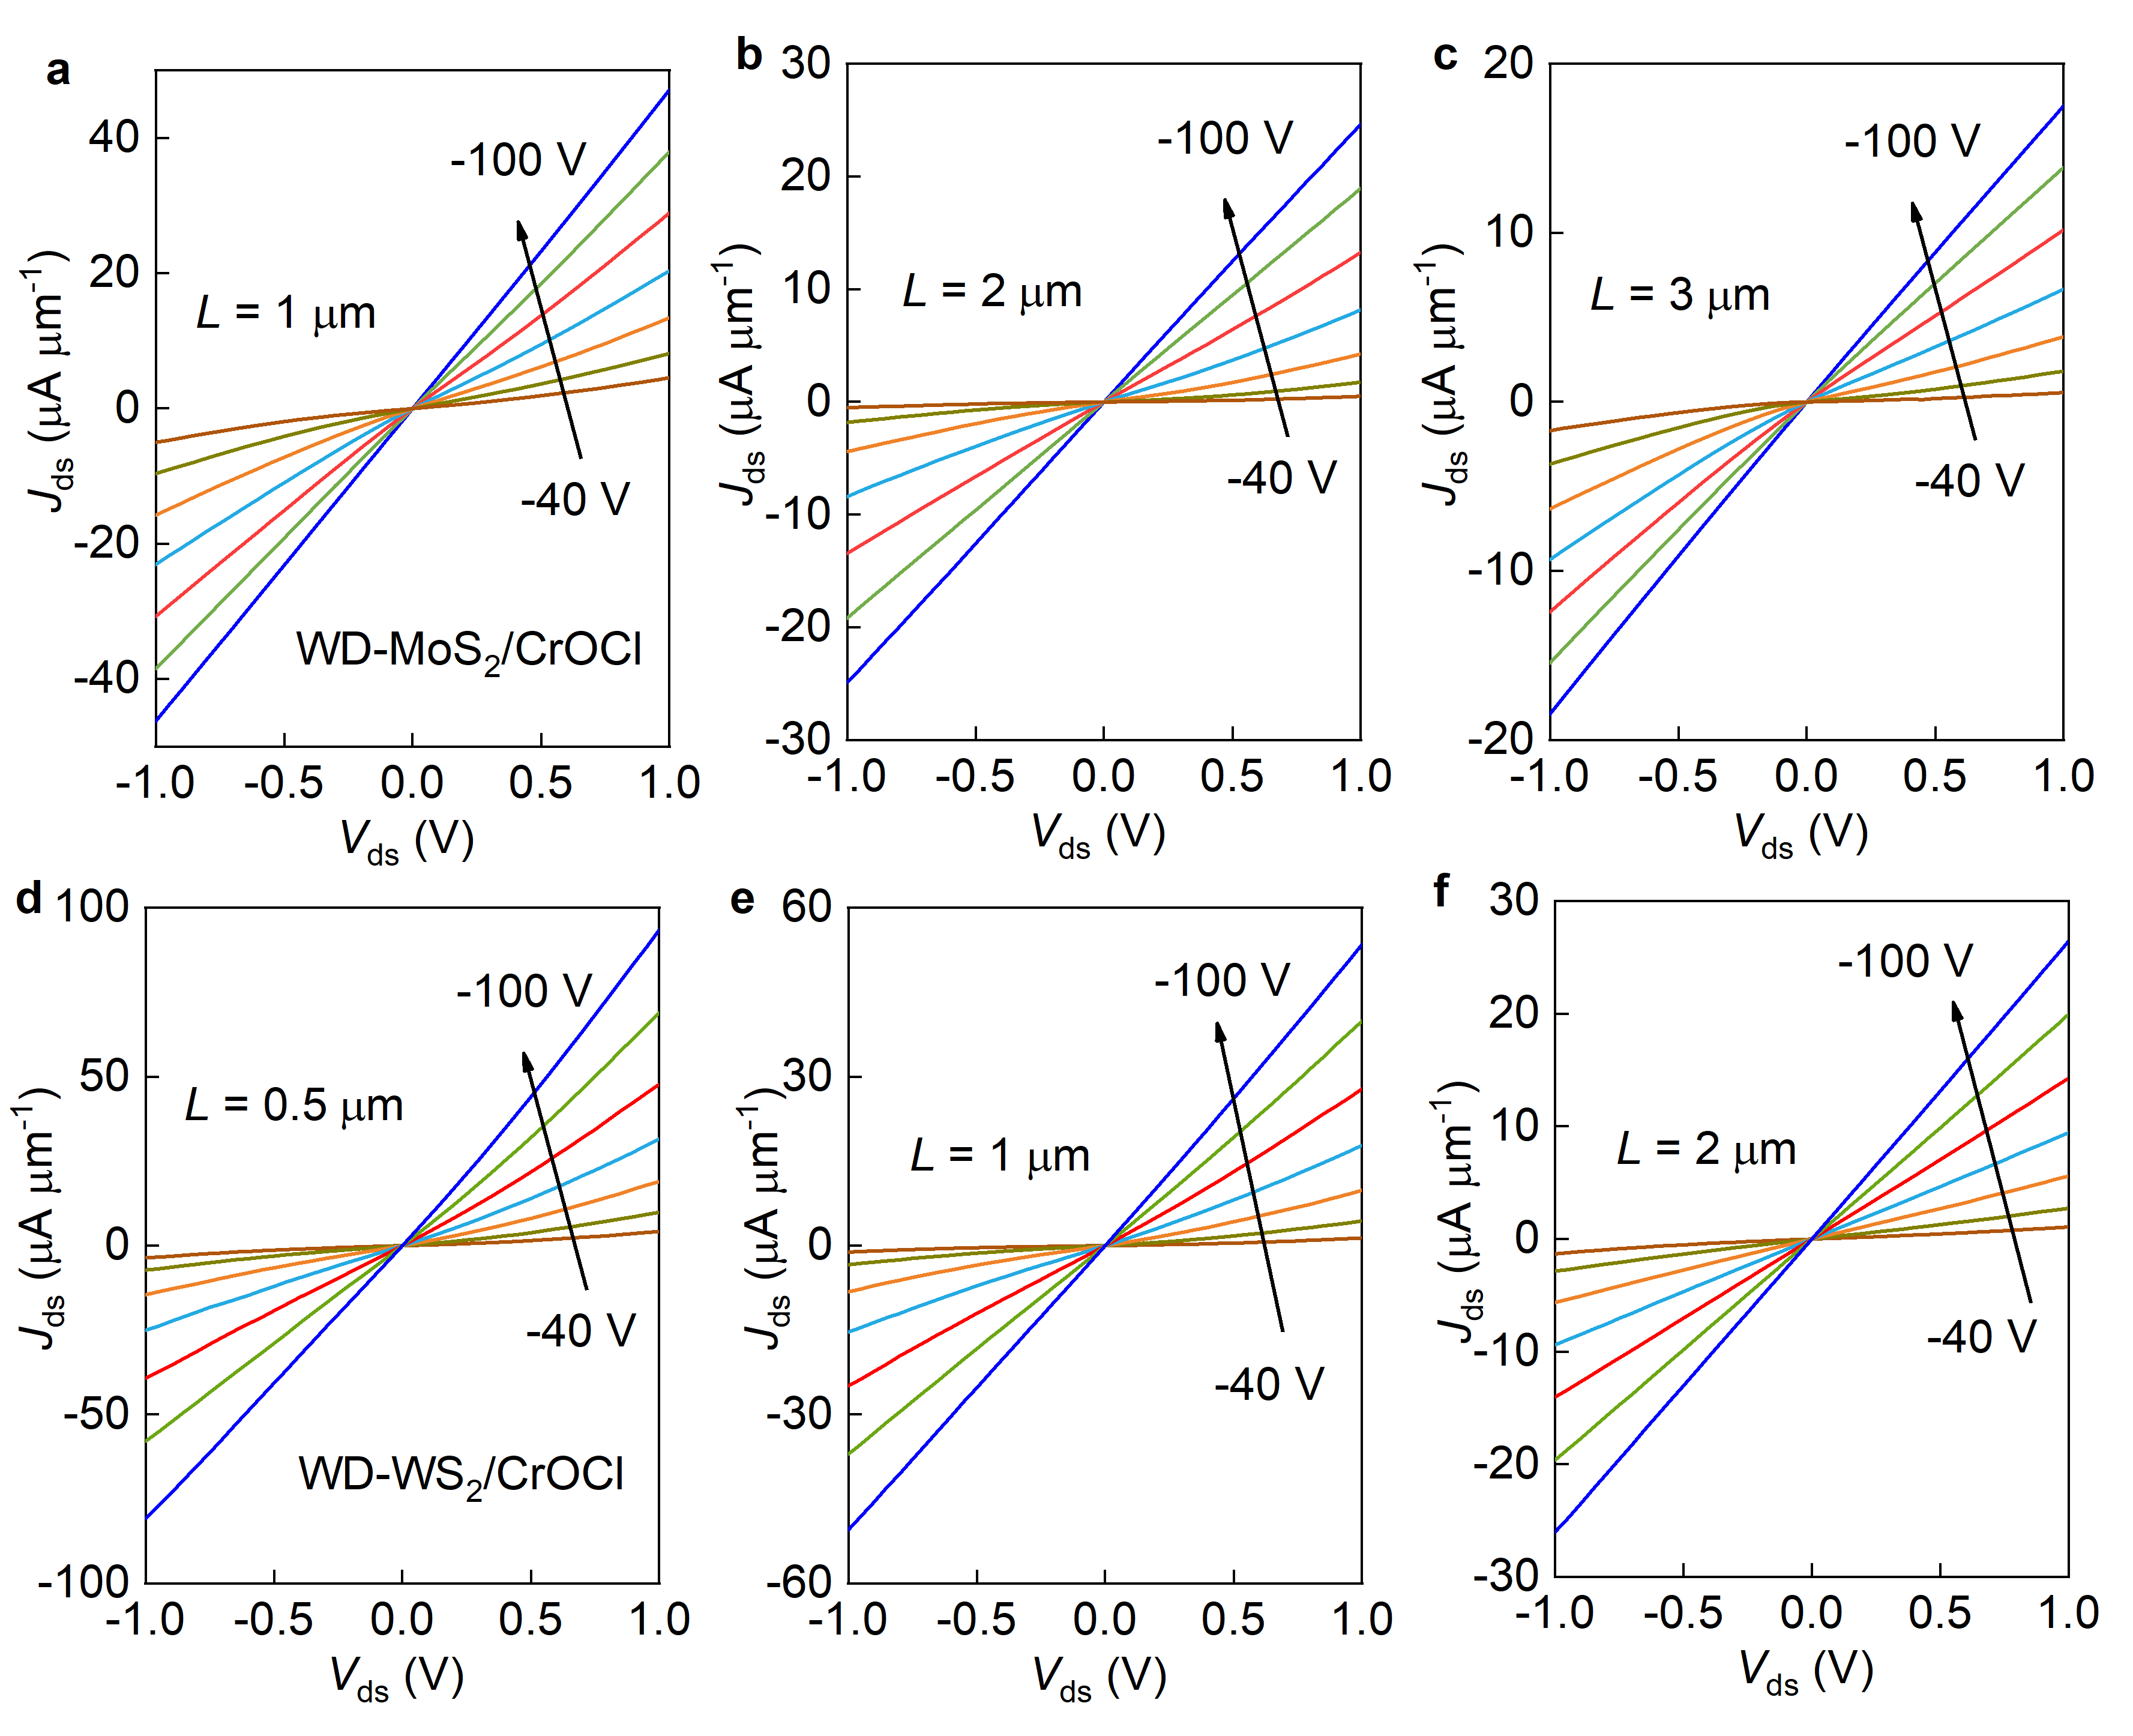


**Supplementary Fig. 4|** **Contact resistance of** **WD-MoS2 and WS2 FETs with Pt as contact.** **a-c,** Output characteristics of WD-MoS2 FETs with channel lengths of (**a**) 1 μm, (**b**) 2 μm, and (**c**) 3 μm. **d-f,** Output characteristics of WD-WS2 FETs with channel lengths of (**d**) 0.5 μm, (**e**) 1 μm, and (**f**) 2 μm.

**
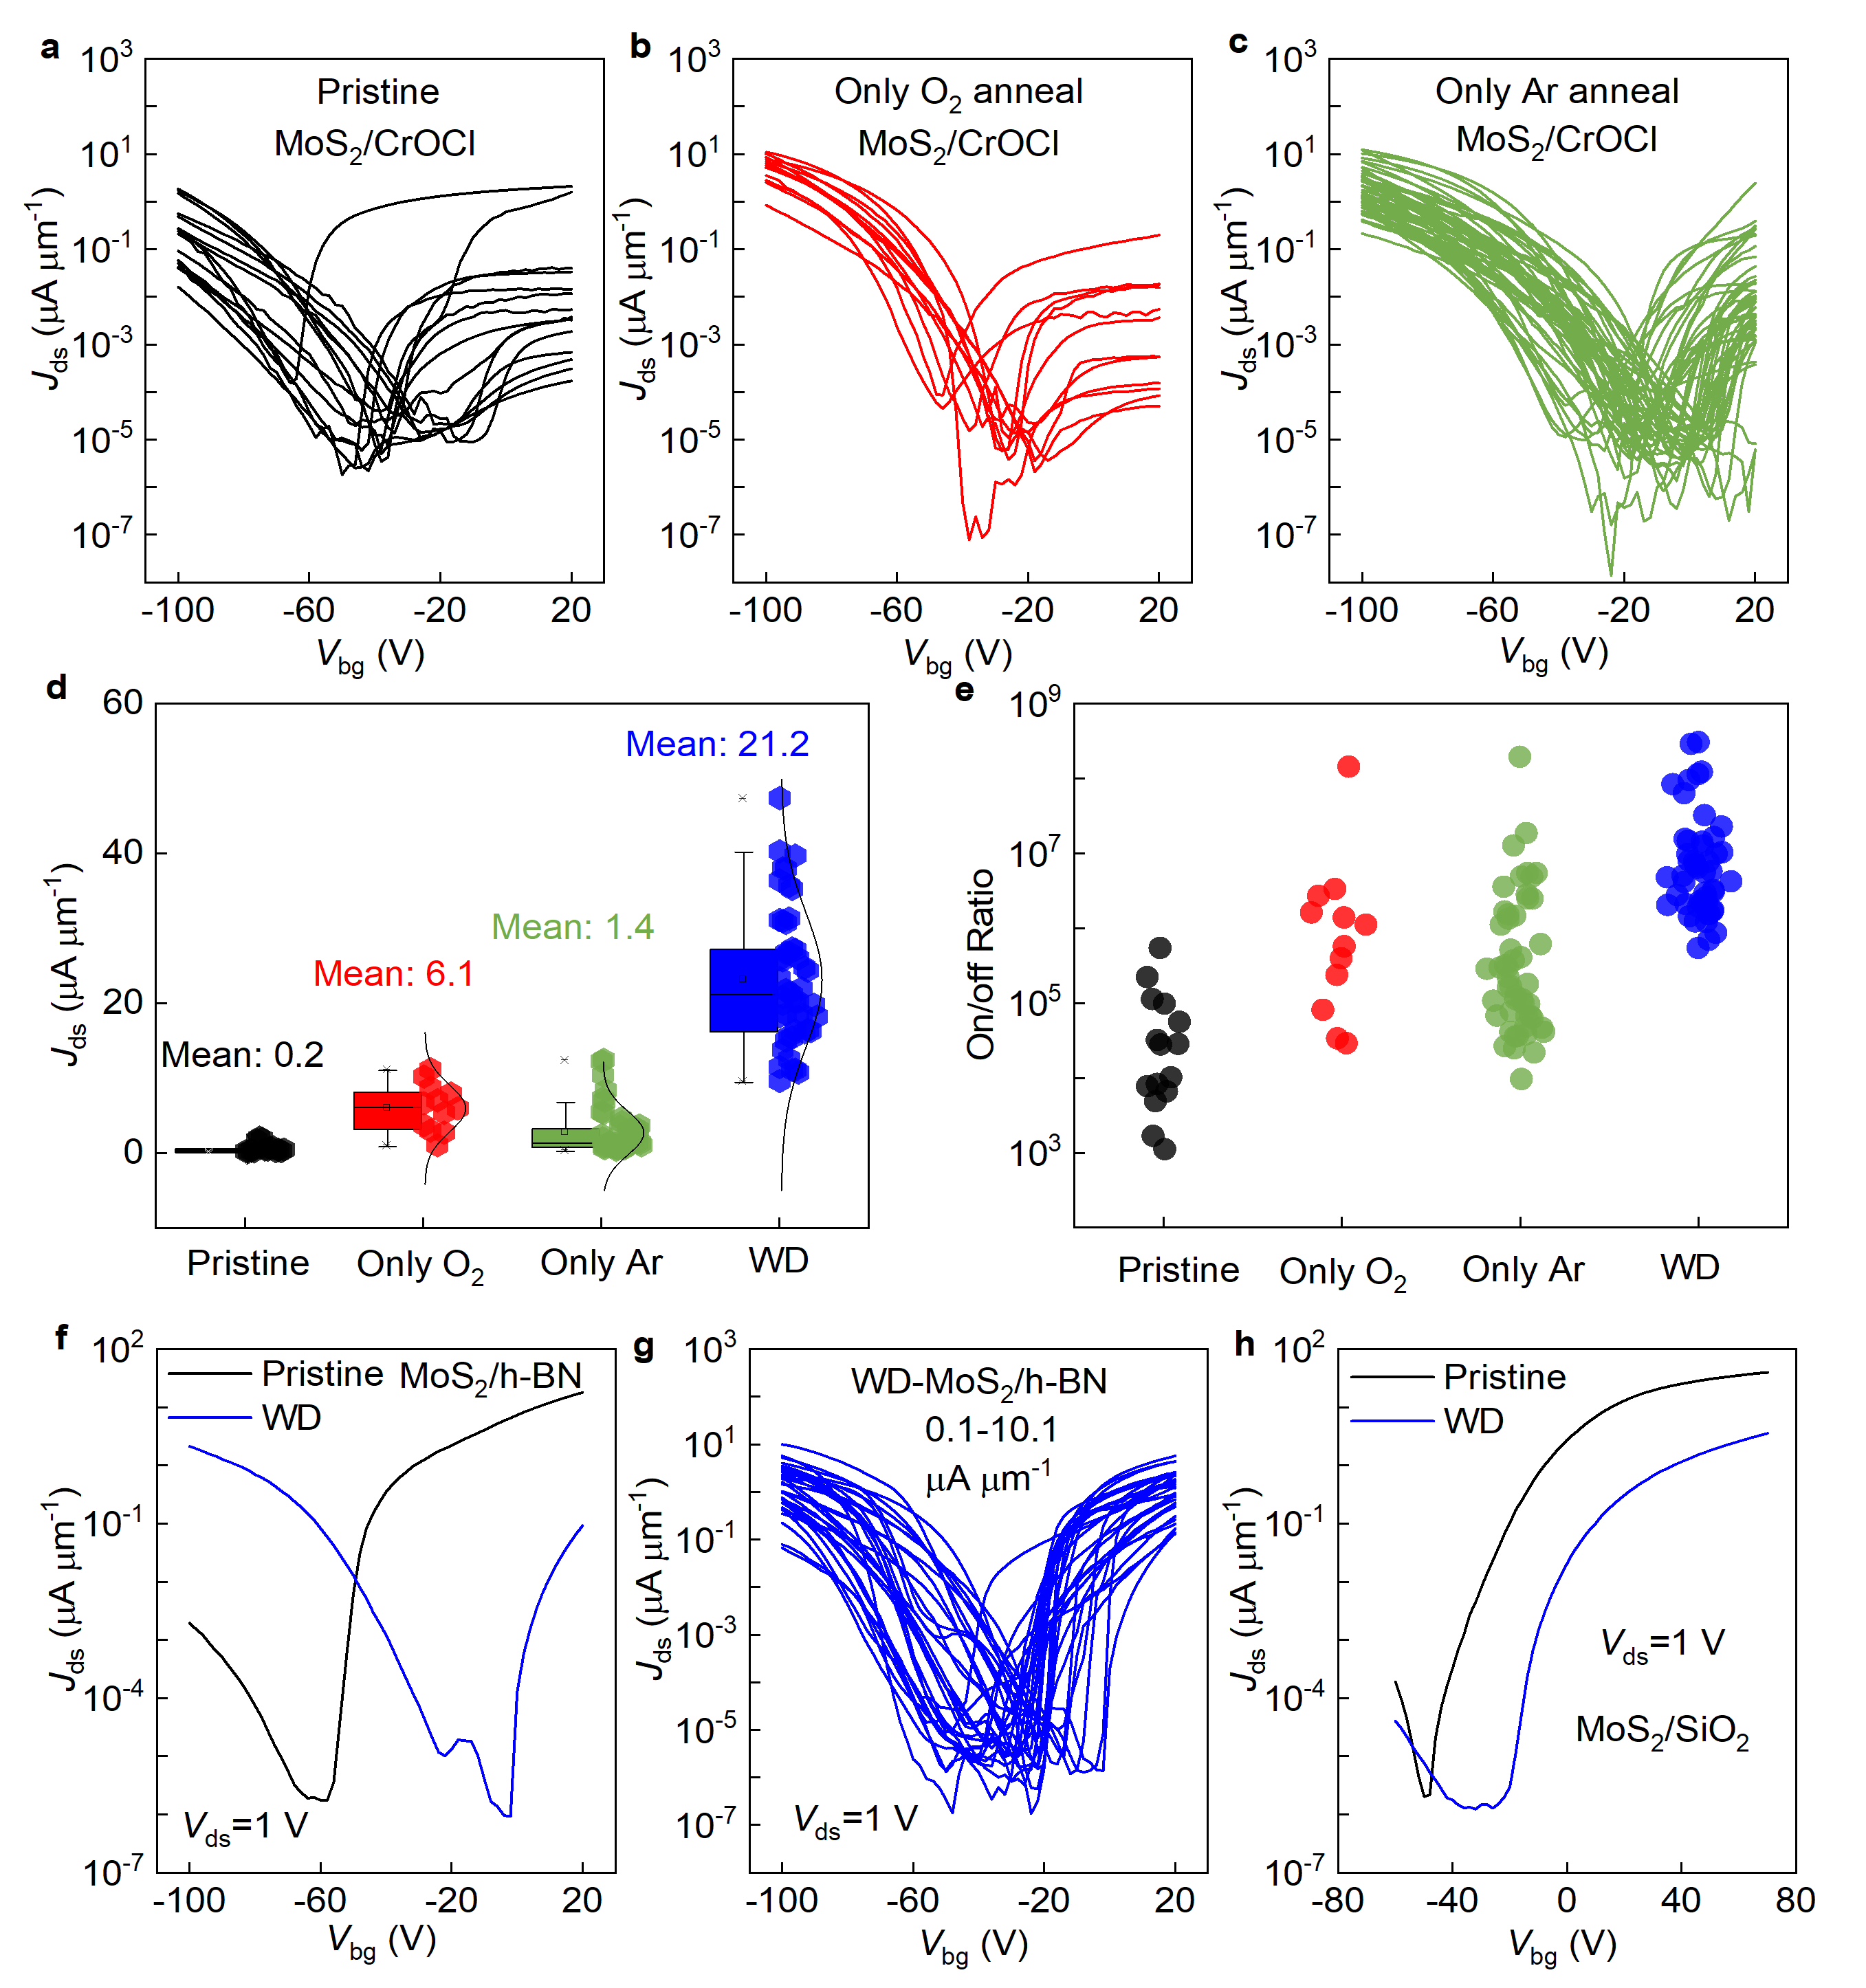
**

**Supplementary Fig. 5| Statistics of MoS2 FETs treated with different processes. a,** Transfer characteristics of 15 Pristine MoS2/CrOCl FETs measured at *V*ds=1 V. **b,** Transfer characteristics of 13 O2-annealed-only MoS2/CrOCl FETs measured at *V*ds=1 V. **c,** Transfer characteristics of 50 Ar-annealed-only MoS2/CrOCl FETs measured at *V*ds=1 V. **d,** Statistics on *J*ds of MoS2 FETs treated with different processes; **e,** Statistics on on/off ratio of MoS2 FETs treated with different processes measured at *V*ds=1 V, *V*bg=-100 V. **f,** Transfer characteristics of MoS2/h-BN FET measured at *V*ds=1 V. **g,** Transfer characteristics of 30 WD-MoS2/h-BN FETs measured at *V*ds=1 V. **h,** Transfer characteristics of a MoS2/SiO2 FET measured at *V*ds=1 V.


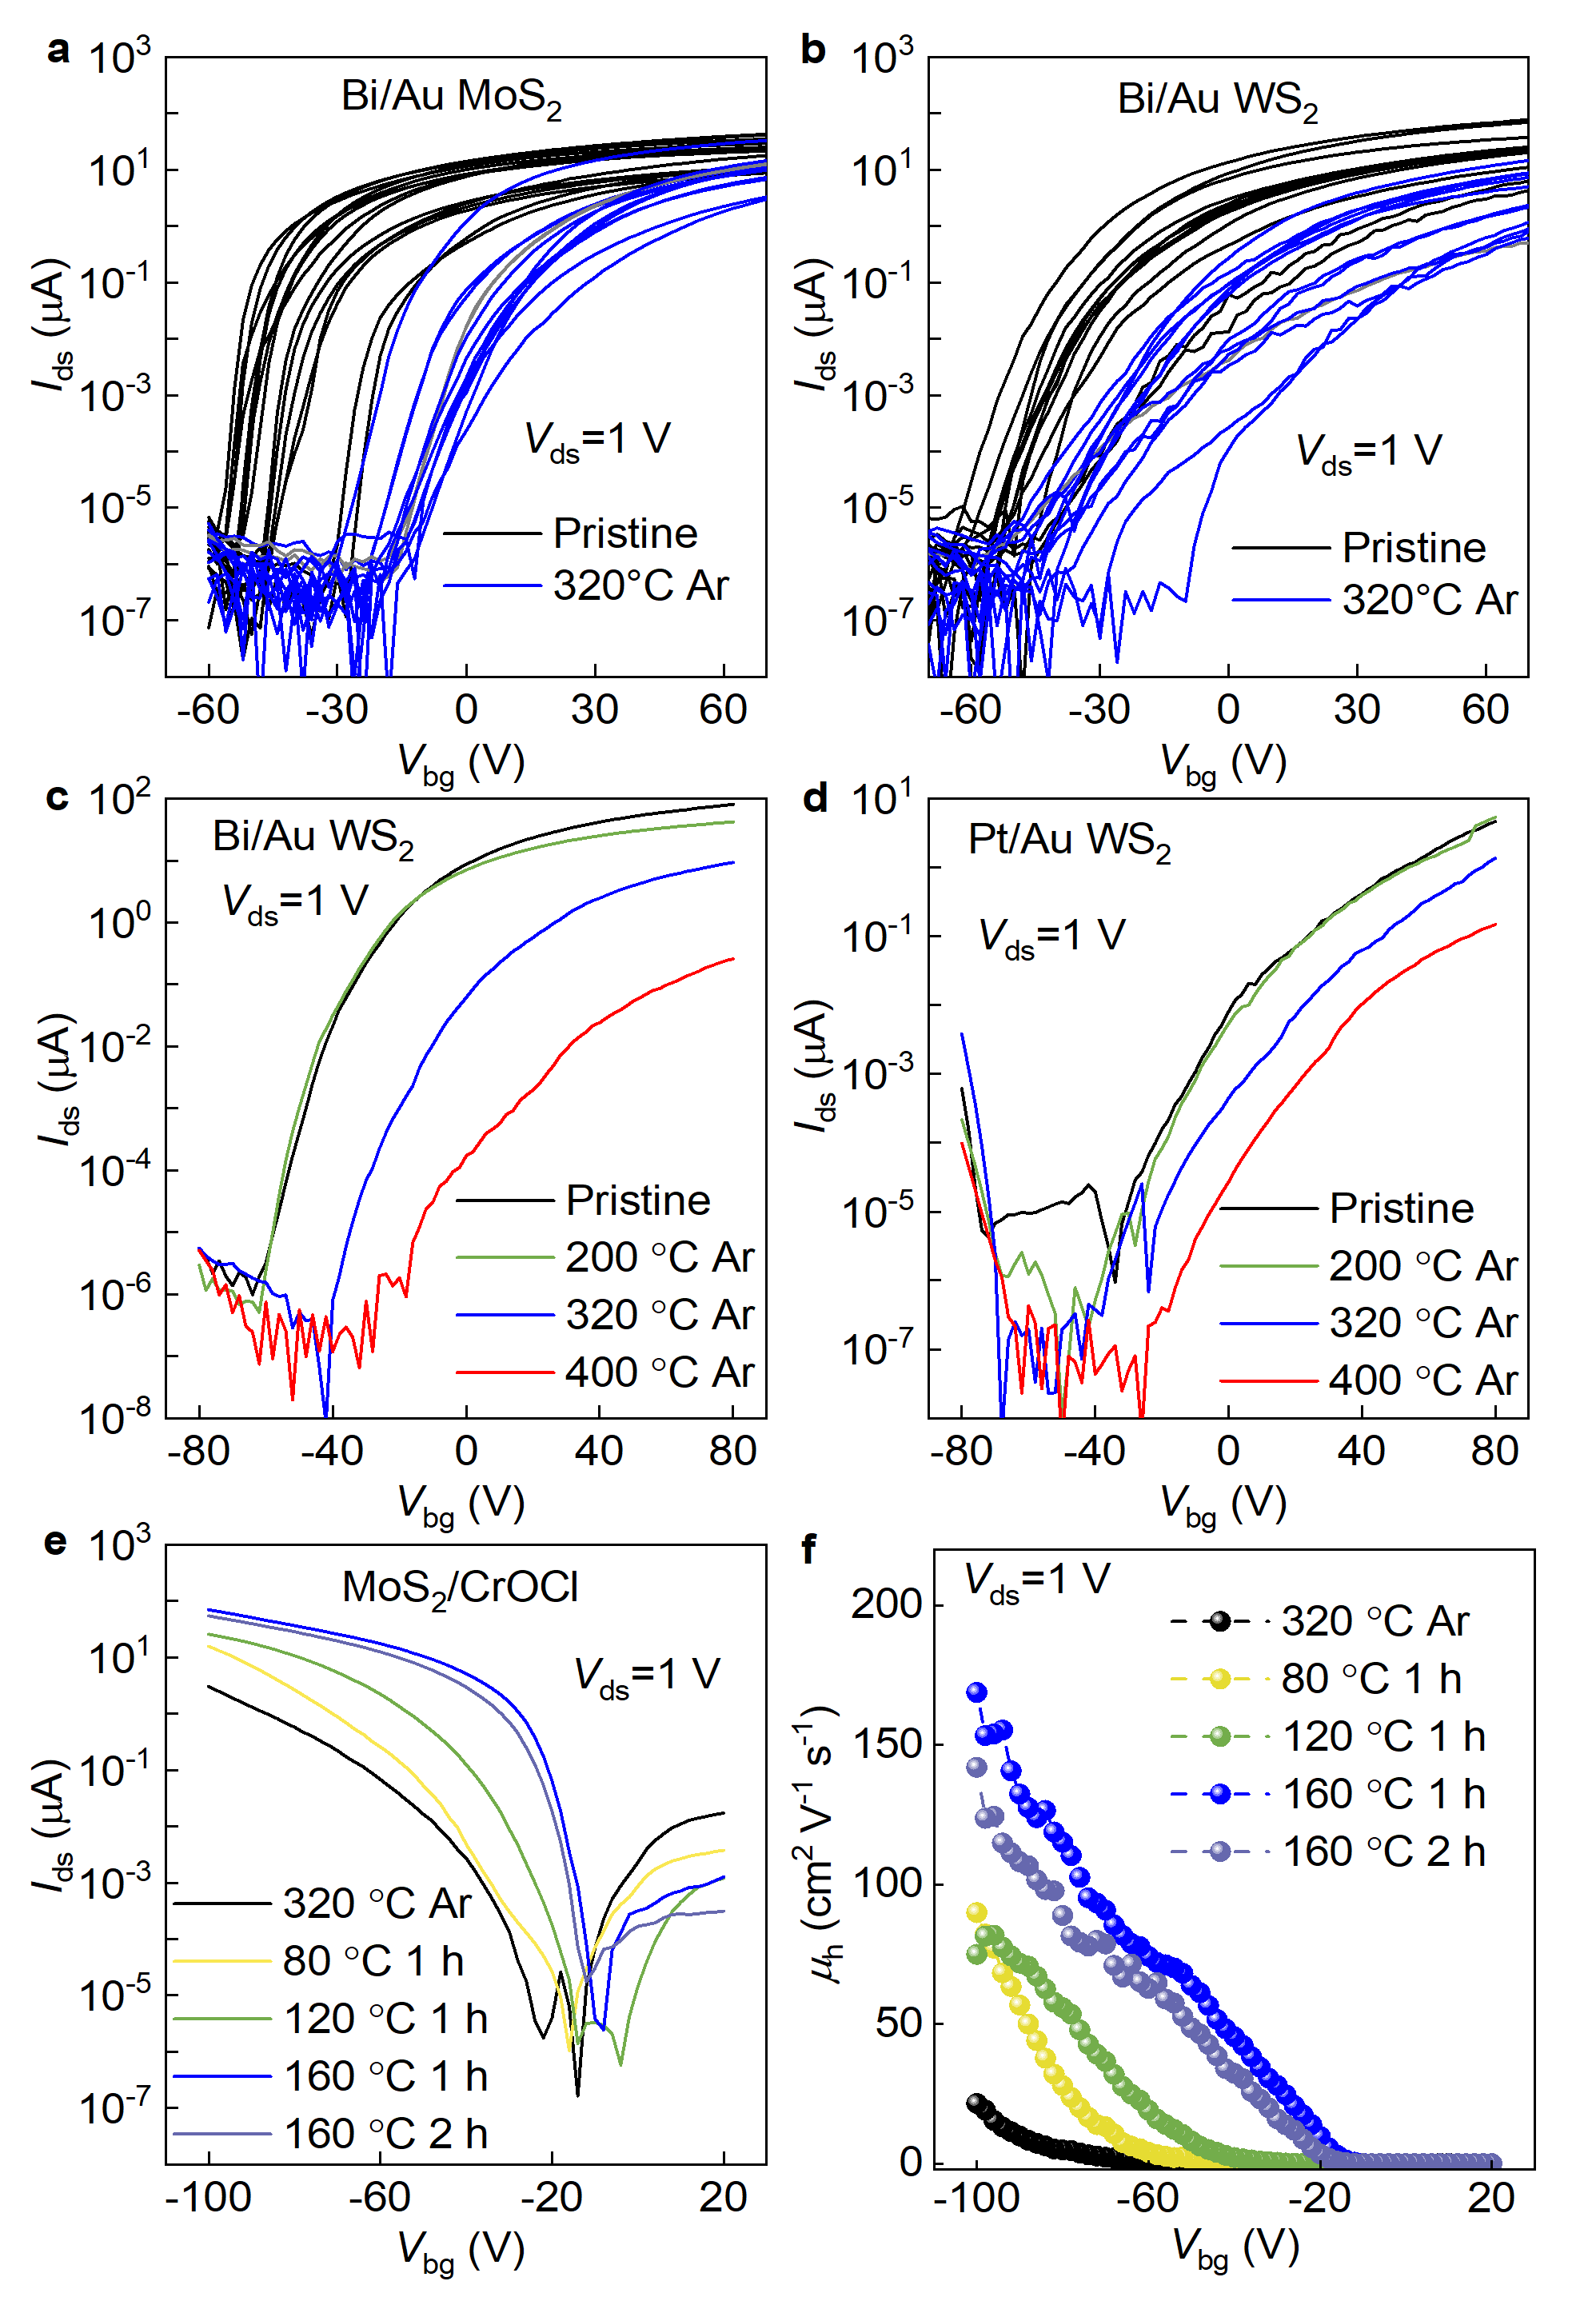


**Supplementary Fig. 6|** **Effect of thermal annealing on the electrical properties of 2D MS2.** **a,** Transfer characteristics of pristine and 320 °C Ar-annealed few-layer MoS2 devices on SiO2 substrates with Bi/Au contacts. **b,** Transfer characteristics of pristine and 320 °C Ar-annealed few-layer WS2 devices on SiO2 substrates with Bi/Au contacts. **c,** Transfer characteristics of pristine and Ar-annealed few-layer WS2 devices with Bi/Au contacts on SiO2 substrates at various Ar annealing temperatures. **d,** Transfer characteristics of pristine and Ar-annealed few-layer WS2 devices with Pt/Au contacts at various Ar annealing temperatures. **Note:** For all devices in panels (a–d), Ar thermal annealing was conducted prior to contact electrode deposition. Device performance shows negligible change after 200 °C Ar annealing. Increasing the Ar annealing temperature to 320 °C and 400 °C induces a more positive shift in the *V*th, indicative of enhanced hole doping. Similar trends are observed across devices with different contact metals, confirming that the annealing-induced hole doping originates from the MS2 material itself rather than the contact electrodes. **e,** Transfer characteristics and **f,** field-effect hole mobility of a MoS2 device on a CrOCl substrate, measured after O2 annealing at various temperatures and durations. The device was pre-annealed at 320 °C in an Ar atmosphere before O2 annealing. The channel length and width of this device are *L*=2 μm and *W* = 2 μm, respectively.


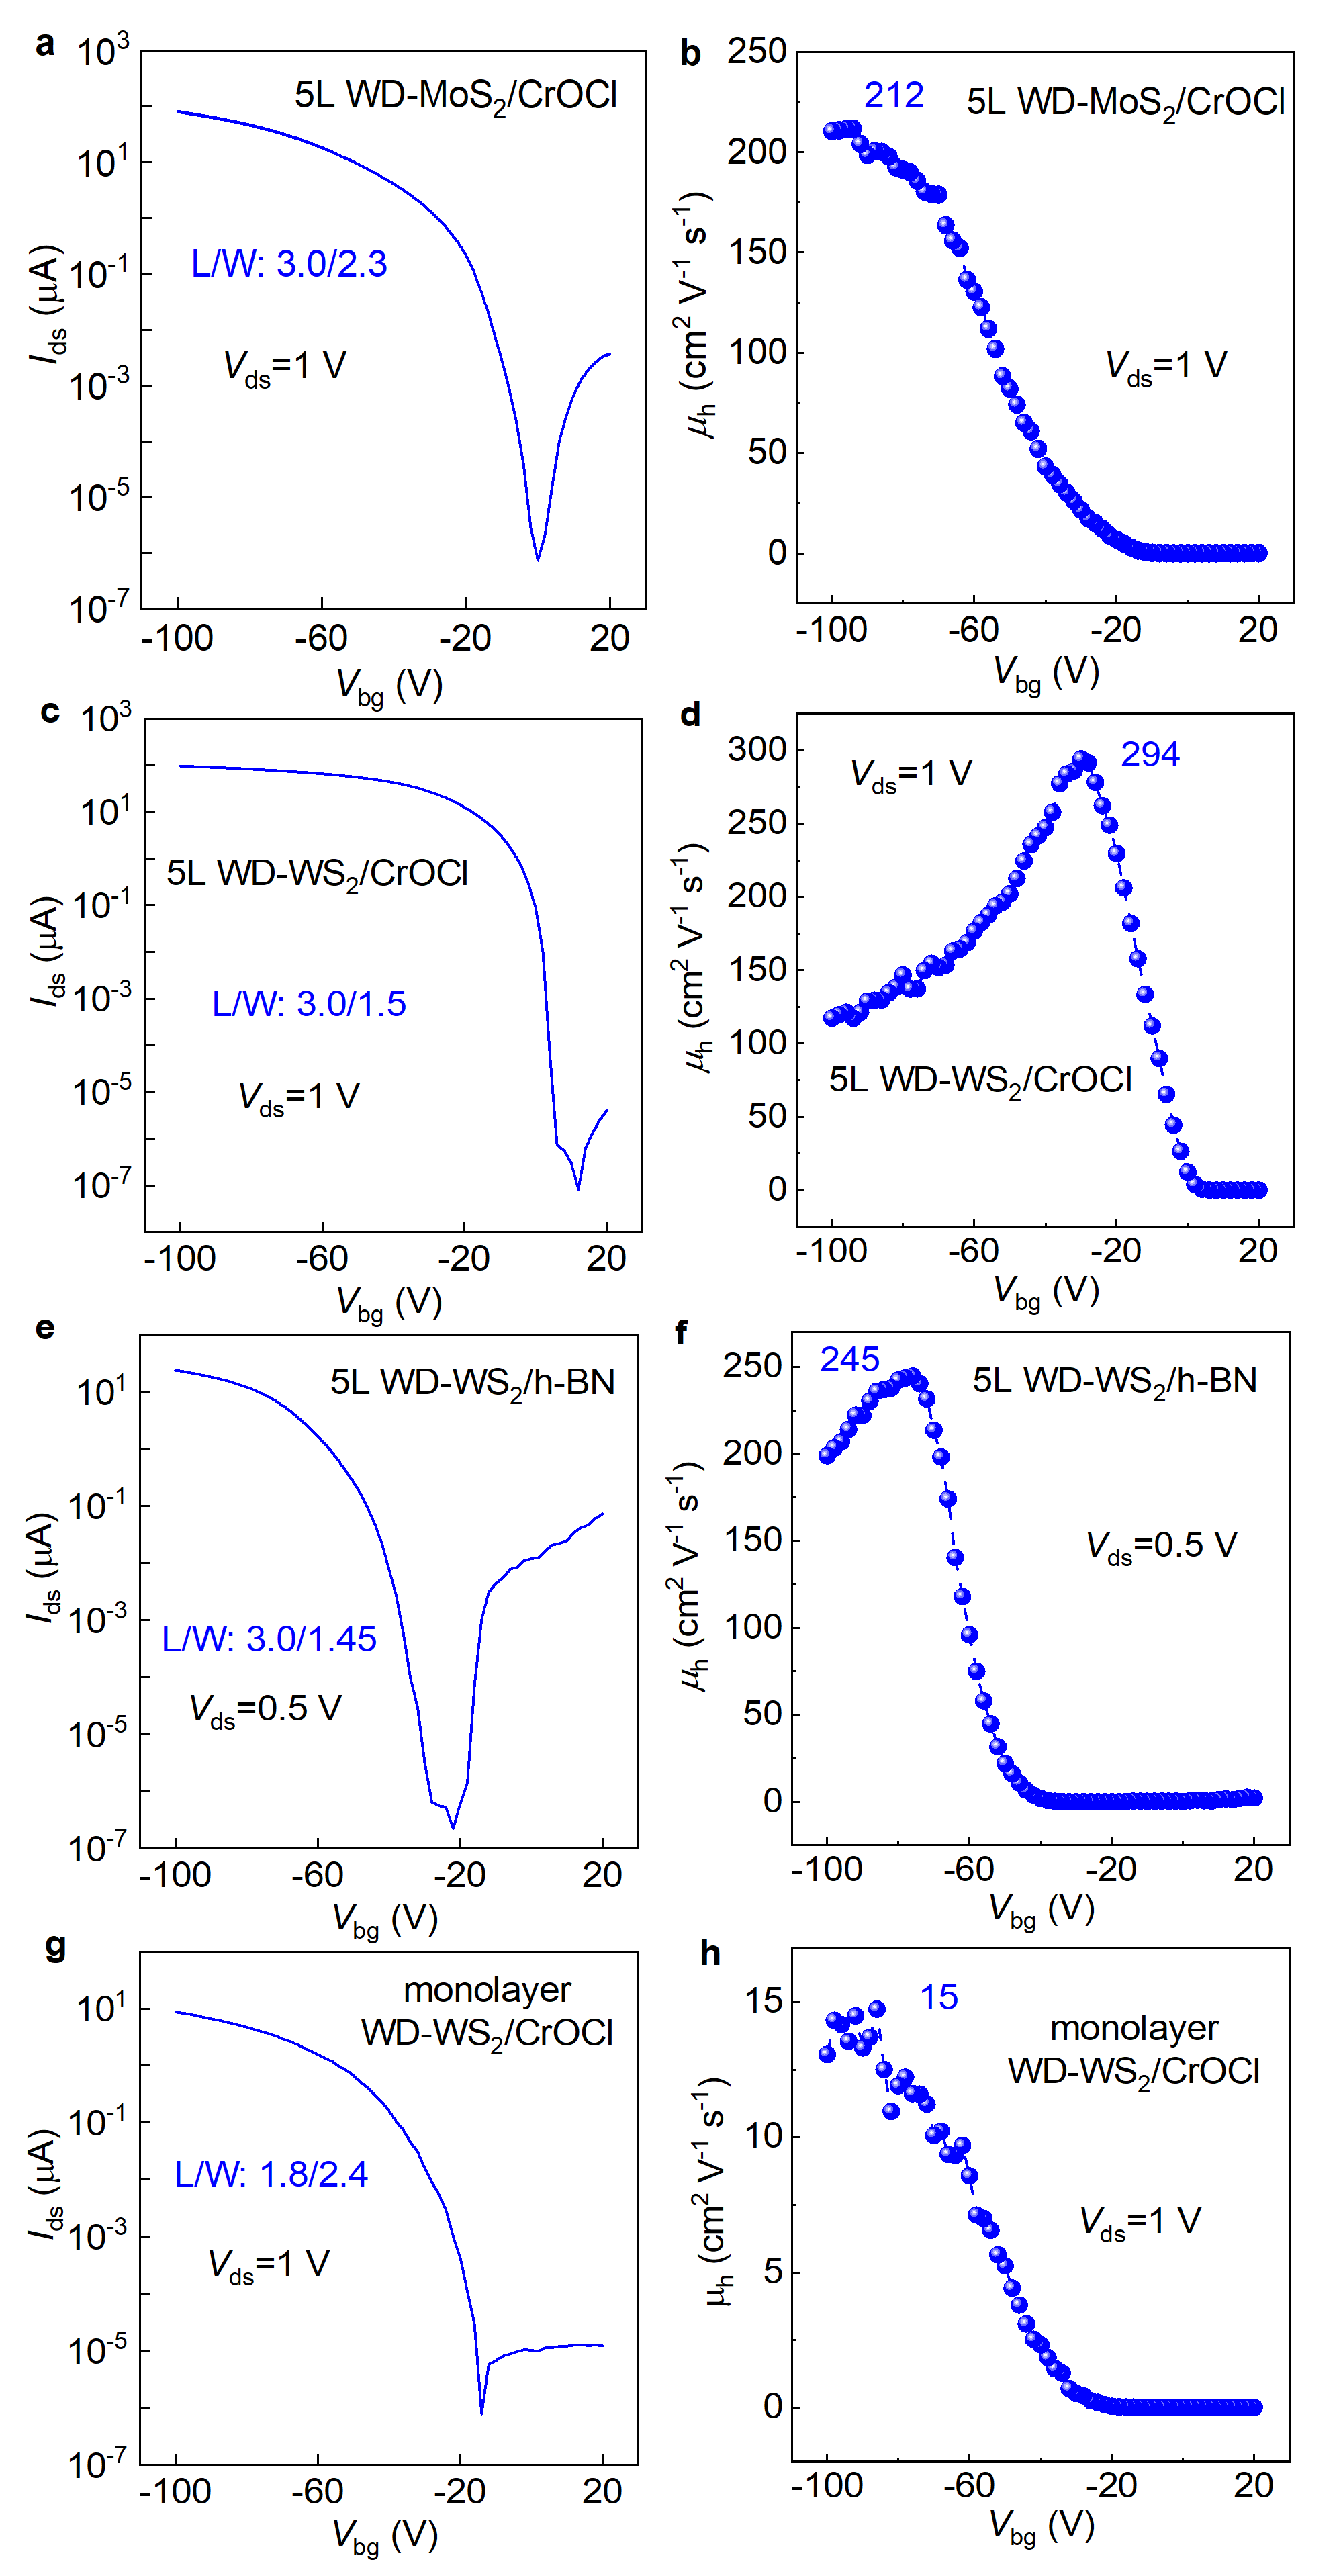


**Supplementary Fig. 7|** **Field-effect hole mobility of WD-MS2** **FETs.** **a,** Transfer characteristics and **b,** field-effect hole mobility of 5-layer (5L) MoS2 FET on CrOCl substrate at *V*ds = 1 V. The channel length (*L*) and channel width (*W*) of this device are (*L*=3 μm, and *W=*2.3 μm, respectively. **c,** Transfer characteristics and **d,** field-effect hole mobility of 5L WS2 FET on CrOCl substrate at *V*ds = 1 V(*L*=3 μm, *W=*1.5 μm).**e,** Transfer characteristics and **f,** field-effect hole mobility of 5L WS2 FET on h-BN substrate at *V*ds = 0.5 V (*L*=3 μm, *W=*1.45 μm). **g,** Transfer characteristics and **h,** field-effect hole mobility of monolayer WS2 FET on CrOCl substrate at *V*ds = 1 V (*L*=1.8 μm, *W=*2.4 μm).


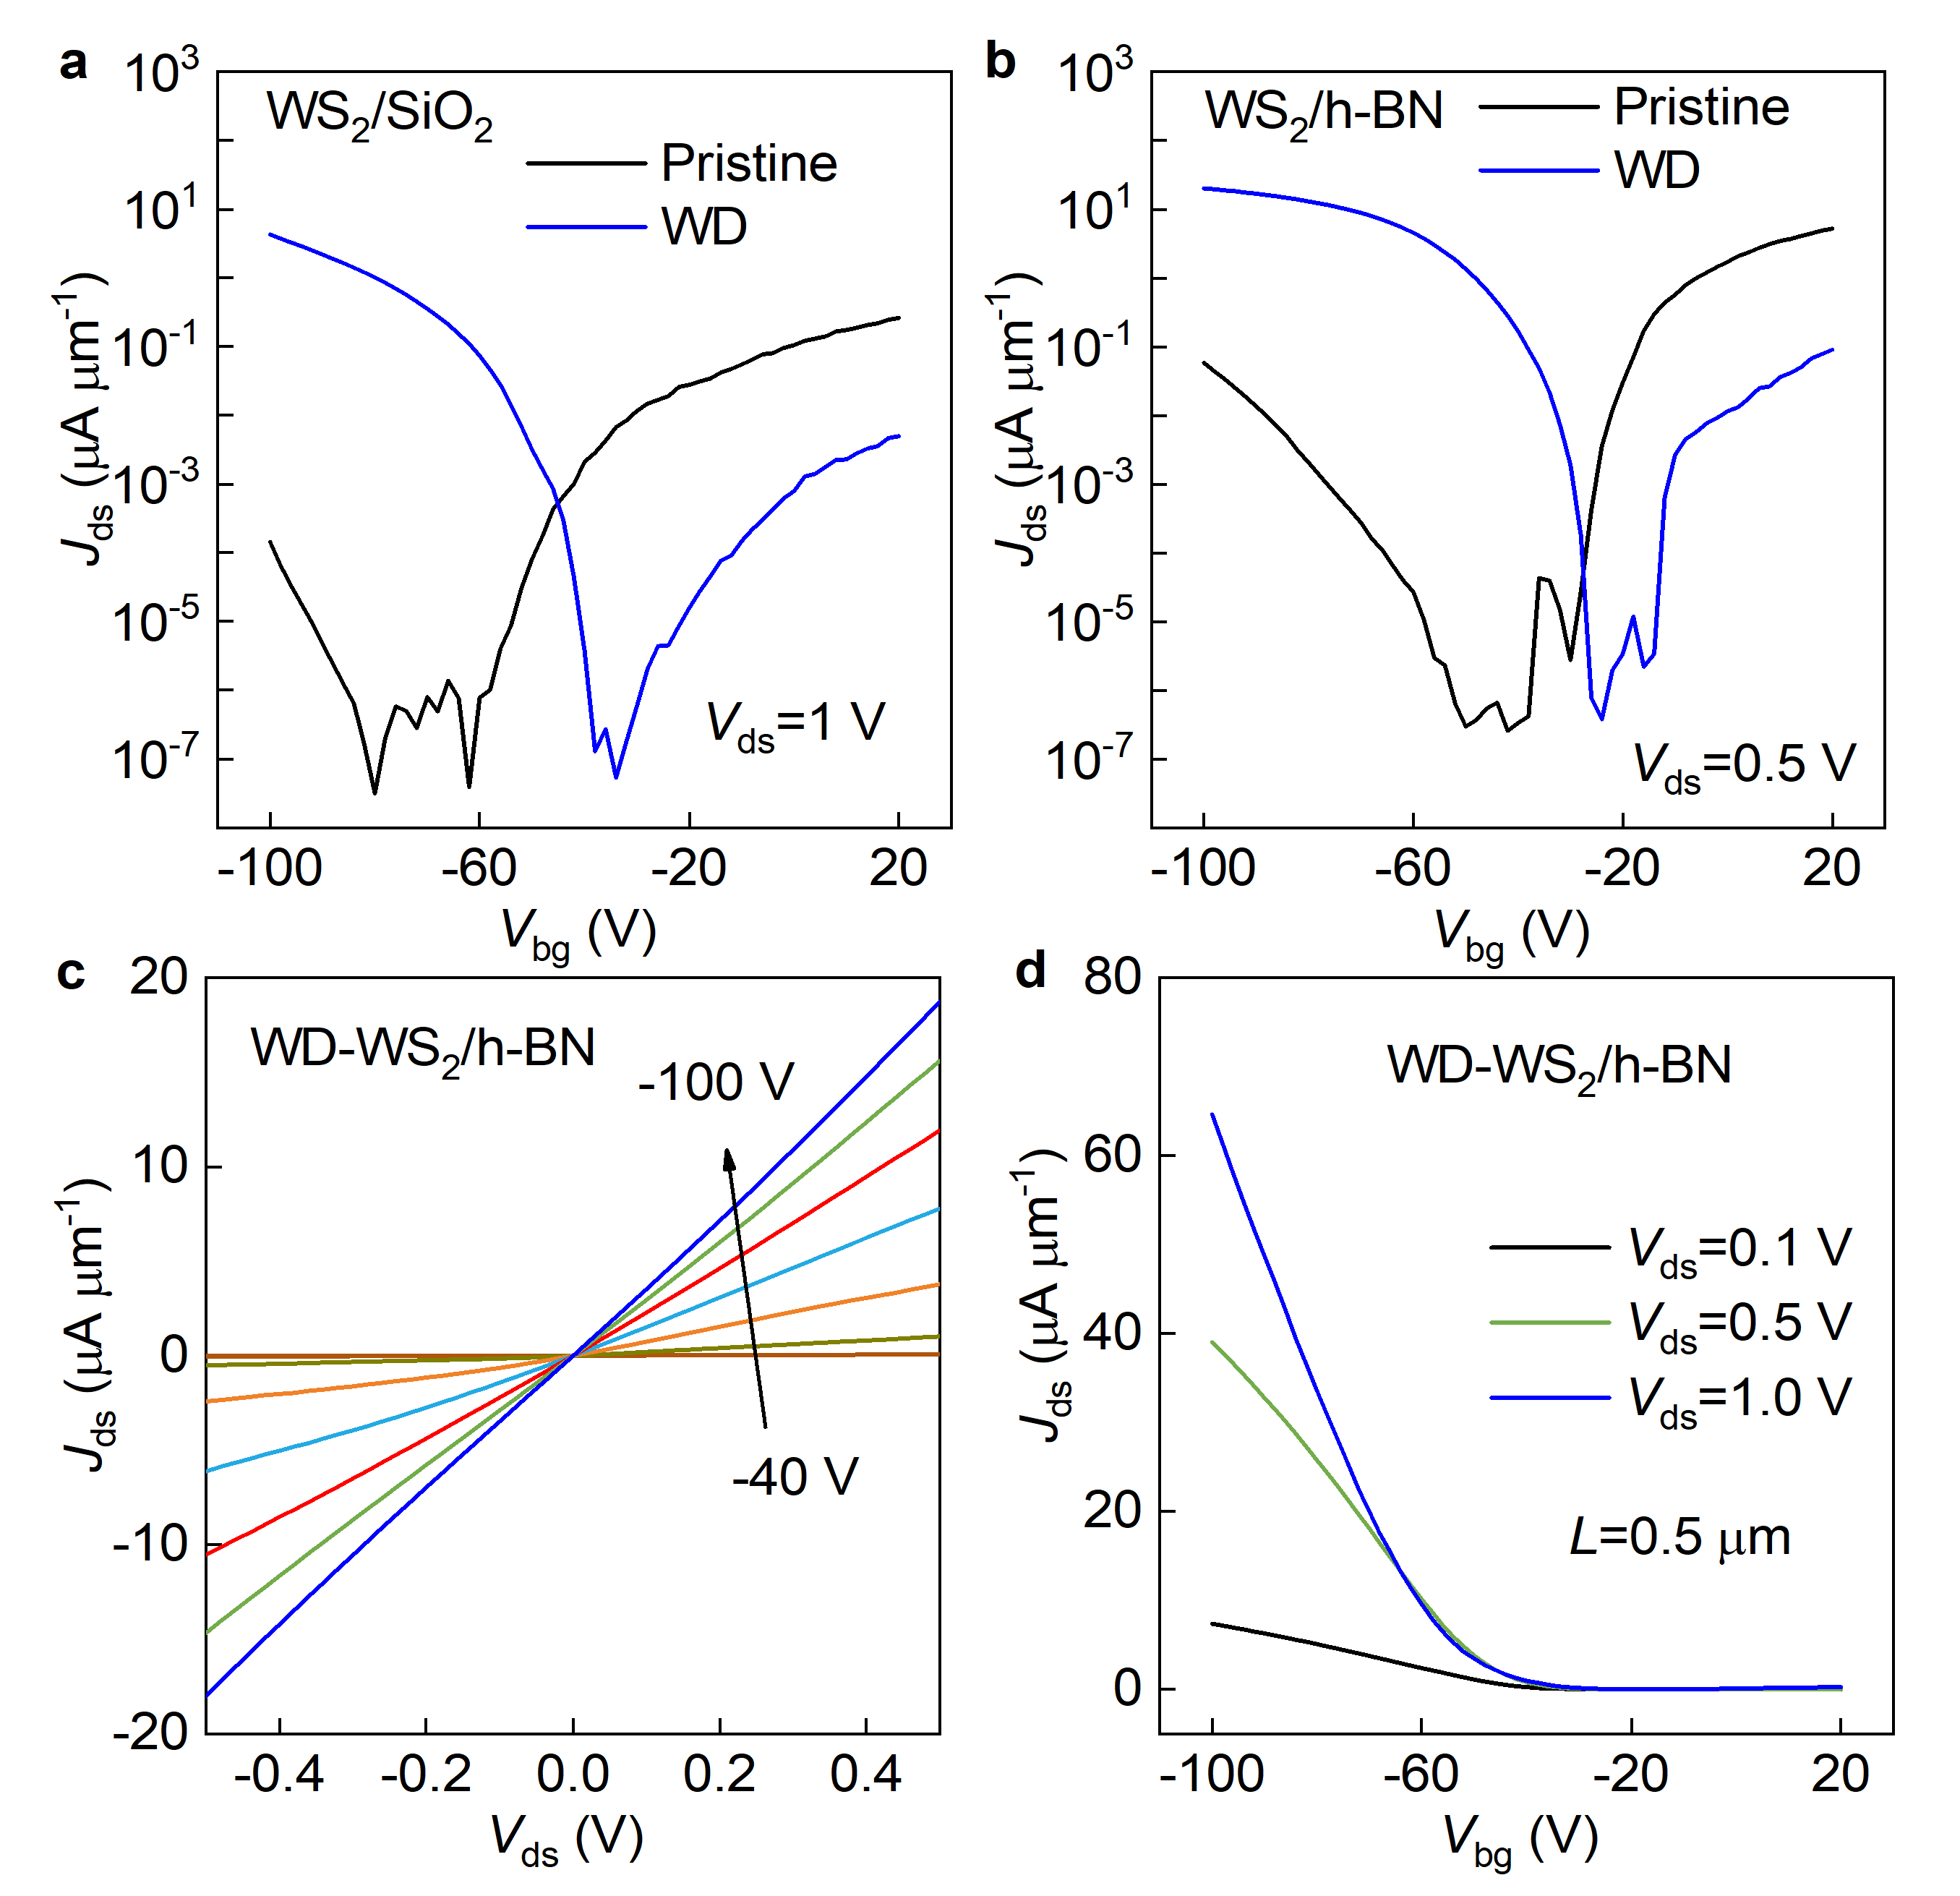


**Supplementary Fig. 8|** **Electrical properties of 2D WS2 FETs.** **a,** Transfer characteristics of a 6L WS2/SiO2 FET (*L* = 1 μm). **b,** Transfer characteristics of a 6L WS2/h-BN FET (*L* = 2 μm). **c,** Output characteristics corresponding to the WD-WS2/h-BN device in (**b**). **d,** Transfer characteristic of a 6L WD-WS2/h-BN FET with a channel length of 0.5 μm. The current density reaches up to 65 μA μm-1 at *V*ds = 1.0 V.


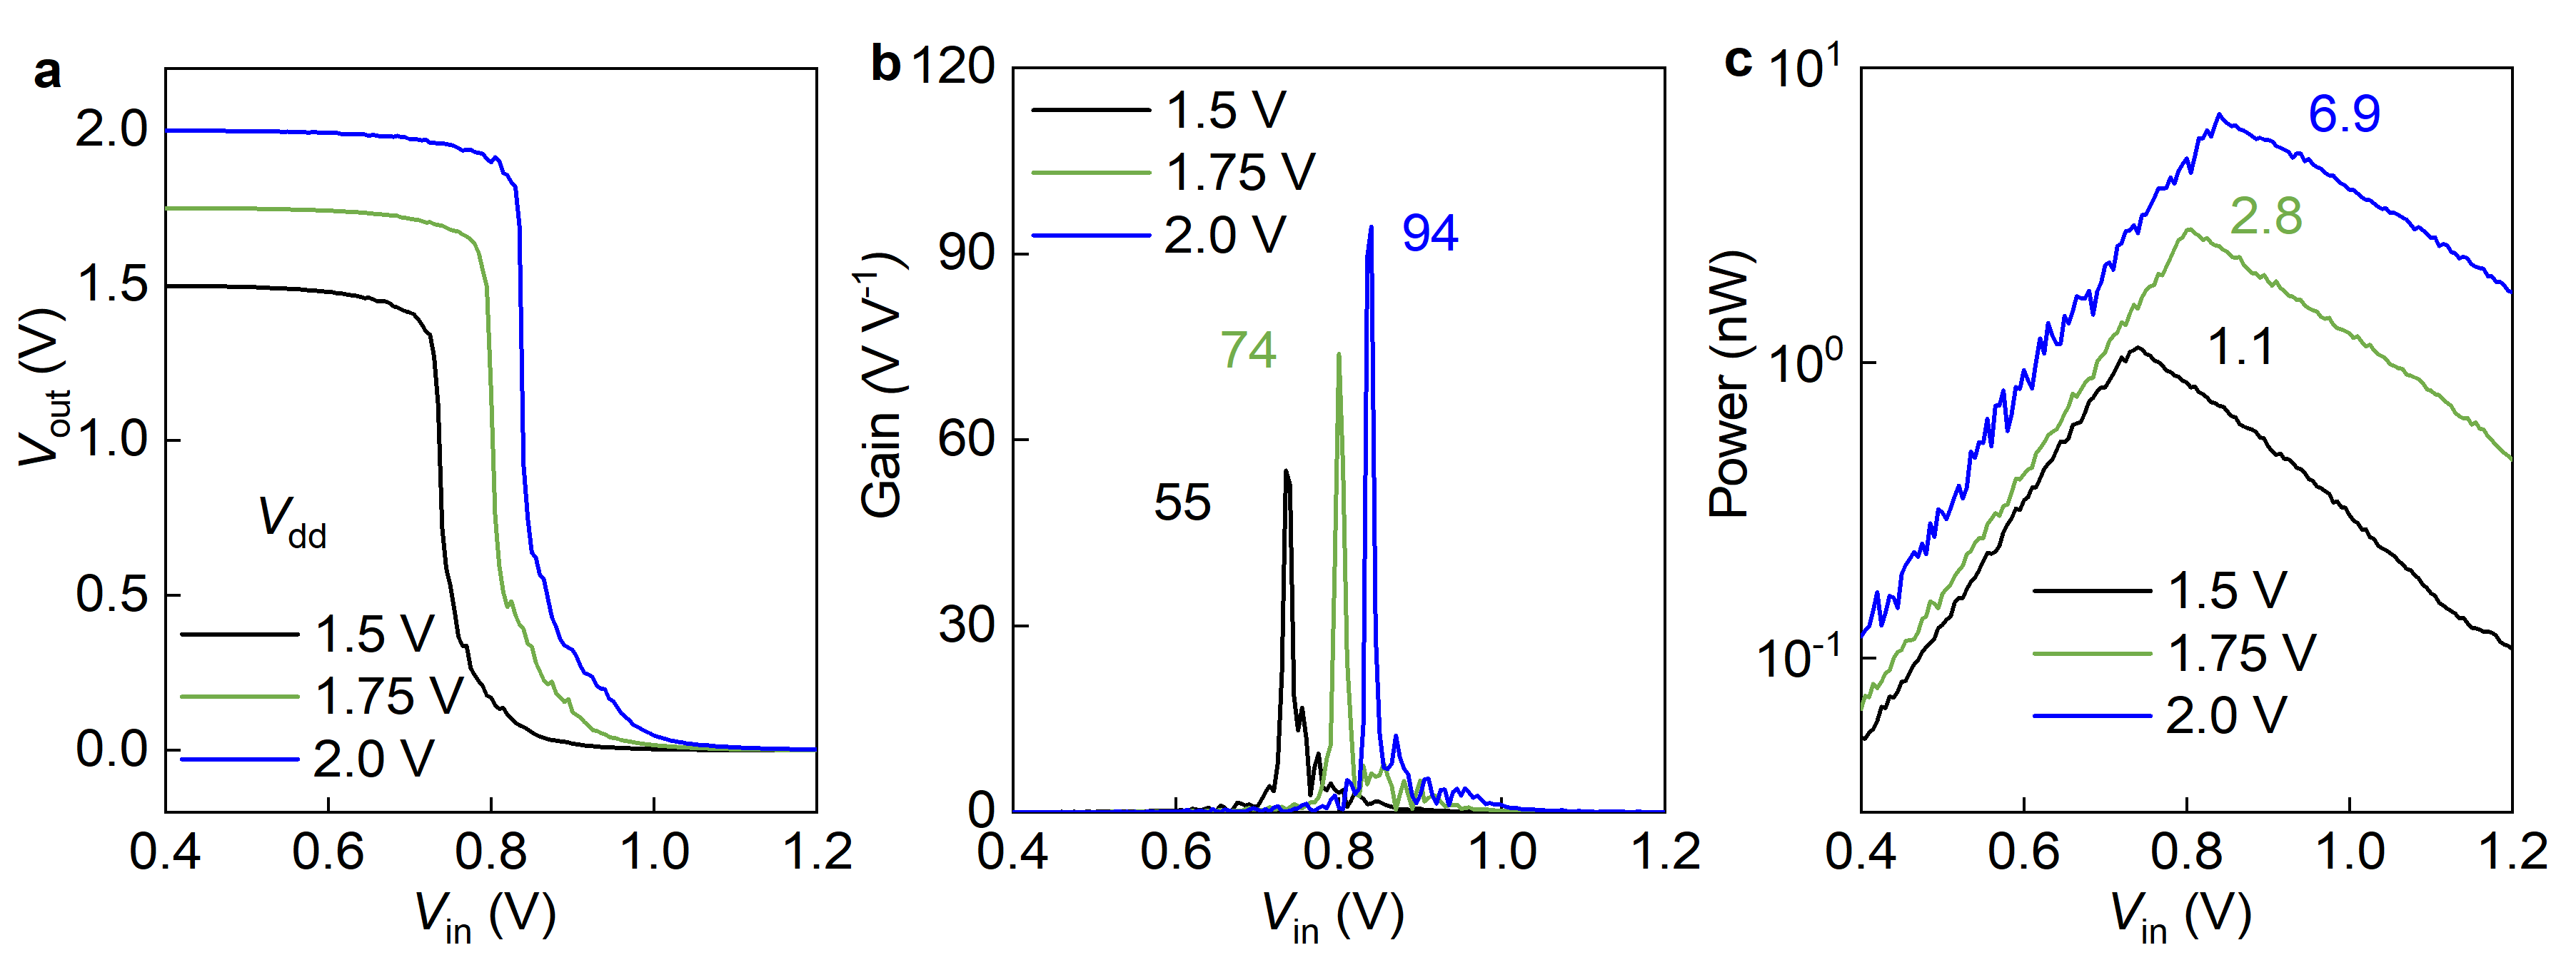


**Supplementary Fig. 9|** **2D** **WS2-based CMOS inverters.** **a**, Voltage transfer characteristics of 2D WS2-based CMOS inverter at *V*dd of 1.5 V, 1.75 V, and 2.0 V. **b**, Voltage gains of 2D WS2-based CMOS inverter at *V*dd of 1.5 V, 1.75 V, and 2.0 V. **c,** Power consumptions of 2D WS2-based CMOS inverter at *V*dd of 1.5 V, 1.75 V, and 2.0 V.

**Supplementary Table 1| Benchmark of *R*c and *I*ON of p-type MS2 FETs, Gain and power consumption of 2D homogeneous CMOS inverters.**

| **p-type MS2 FETs** | | | | |
| --- | --- | --- | --- | --- |
| Material | Doping strategy | *R*C  (kΩ﹒µm) | *I*ON (*L*, *V*ds)  (µA µm-1) | Ref. |
| >10L MoS2 | Charge transfer from AuCl3 | 2.3 | 21  (1 µm, 1 V) | 1 |
| 1L MoS2 | Charge transfer from WCl6 | —— | 0.8  (5 µm, 0.1 V) | 2 |
| 3-20L MoS2 | —— | 430 | 4.2  (2 µm, 1 V) | 3 |
| >10L MoS2 | —— | —— | 1  (13.5 µm, 1 V) | 4 |
| 10L MoS2 | CrOCl charge transfer | 8.8 | 4.5  (6 µm, 1 V) | 5 |
| 1L WS2 | V doped | —— | <0.1  (4 µm, 2 V) | 6 |
| 1L WS2 | N doped | —— | 1  (5 µm, 1 V) | 7 |
| 1L WS2 | Na doped | —— | 0.2  (10 µm, 1 V) | 8 |
| 5L WD-MoS2 | CrOCl charge transfer  Weak disorder | **2.5** | **47**  **(1 µm, 1 V)** | **This work** |
| 5L WD-WS2 | CrOCl charge transfer  Weak disorder | **0.78** | **125**  **(0.5 µm, 1 V)** |  |
| 6L WD-WS2 | Weak disorder | —— | **65**  **(0.5 µm, 1 V)** |  |
| **2D homogeneous CMOS** | | | | |
| Material | *V*dd (V) | Peak power (pW) | Gain (V V-1) | Ref. |
| MoTe2 | 1 | 1000 | 50 | 9 |
| WSe2 | 1 | 21 | 9.2 | 10 |
| MoS2 | 1 | 518 | 2 | 5 |
| WS2 | 1 | **331** | **20.7** | **This work** |
| WS2 | 0.2 | **0.3** | **3.9** |  |

**References**

1 Liu, X., Qu, D., Ryu, J. *et al.* P-Type Polar Transition of Chemically Doped Multilayer MoS2 Transistor. *Advanced Materials* **28**, 2345-2351 (2016).

2 Jung, Y. S., Kim, J. Y., Shen, W. *et al.* Efficient n- and p-Type Molecular Dopings in Large-Scale Monolayer Dichalcogenides for High-Performance Field-Effect Transistors. *ACS Nano* **19**, 17438-17449 (2025).

3 Wang, Y., Kim, J. C., Li, Y. *et al.* P-type electrical contacts for 2D transition-metal dichalcogenides. *Nature* **610**, 61-66 (2022).

4 Liu, Y., Guo, J., Zhu, E. *et al.* Approaching the Schottky–Mott limit in van der Waals metal–semiconductor junctions. *Nature* **557**, 696-700 (2018).

5 Guo, Y., Li, J., Zhan, X. *et al.* Van der Waals polarity-engineered 3D integration of 2D complementary logic. *Nature* **630**, 346-352 (2024).

6 Gao, B., Wang, W., Meng, Y. *et al.* Electrical Polarity Modulation in V-Doped Monolayer WS2 for Homogeneous CMOS Inverters. *Small* **20**, 2402217 (2024).

7 Kang, Y., Pei, Y., He, D. *et al.* Spatially selective p-type doping for constructing lateral WS2 p-n homojunction via low-energy nitrogen ion implantation. *Light: Science & Applications* **13**, 127 (2024).

8 Xie, J., Meng, G., Chen, B. *et al.* Vapor–Liquid–Solid Growth of Morphology-Tailorable WS2 toward P-Type Monolayer Field-Effect Transistors. *ACS Applied Materials & Interfaces* **14**, 45716-45724 (2022).

9 Xu, W., Li, H., Xie, Y. *et al.* High-Gain Integrated Complementary Inverters Using Doping-Free MoTe2 Transistors. *Advanced Functional Materials* **n/a**, 2509428

10 Hsu, C. H., Hou, F. R., Hsu, T. W. *et al.* Low-Power CMOS Inverter Using Homogeneous Monolayer WSe₂ Channel With Polarity Control. *IEEE Electron Device Letters* **46**, 1231-1234 (2025).
